# Supplementary material for: The conformational changes of Zika virus methyltransferase upon converting SAM to SAH
Source: PubMed Central journal article supplement (PMC5362447; doi:10.18632/oncotarget.14780), 2017-01-21
Supplement: oncotarget-08-14830-s001.pdf [file oncotarget-08-14830-s001.pdf]

## The conformational changes of Zika virus methyltransferase upon converting SAM to SAH

### Supplementary Materials

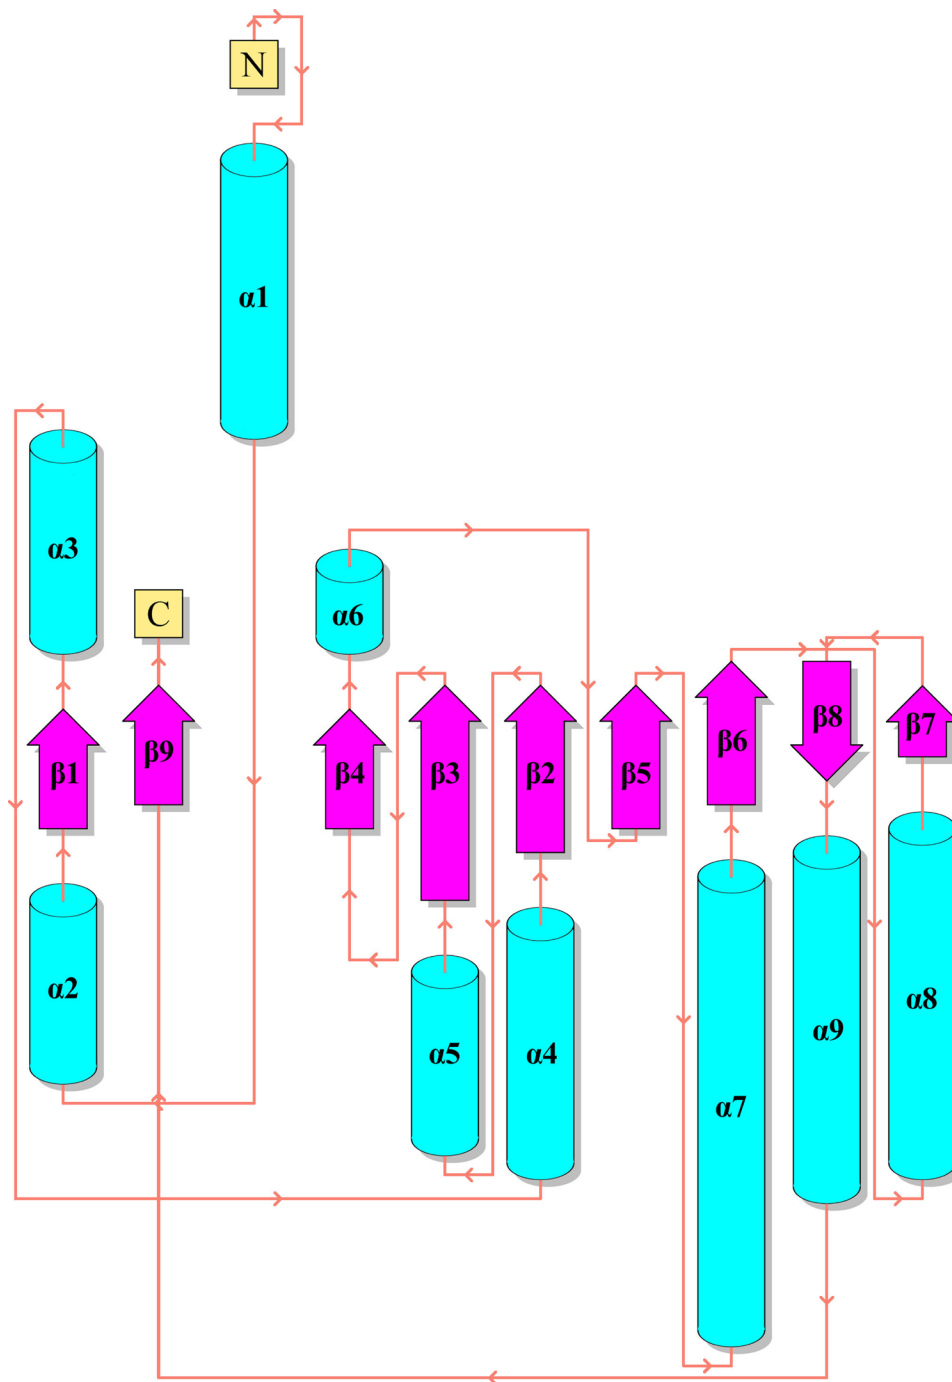

Supplementary Figure 1: The topology diagram of the protein fold of MTase. Color codes are the same as in Figure 1B

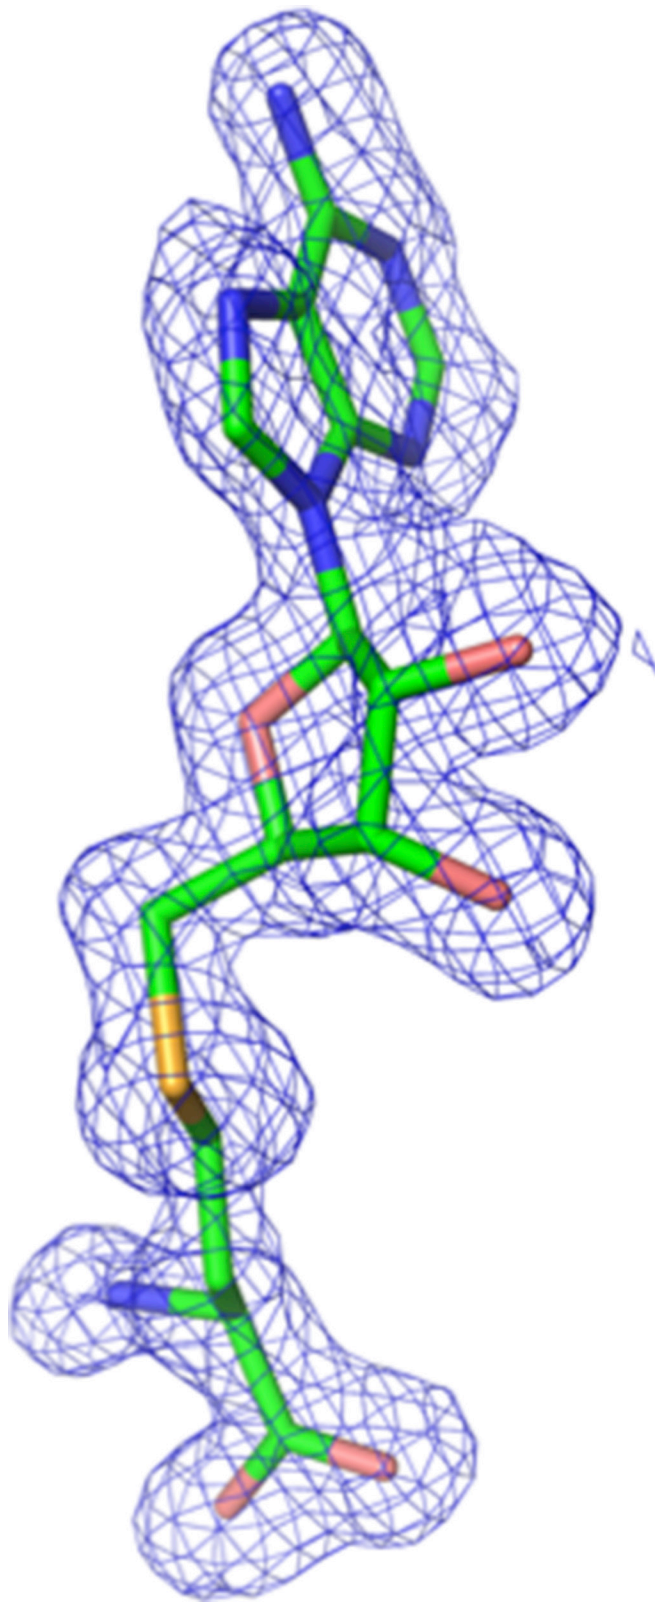

**Supplementary Figure 2: Electron density maps of SAH.** 2mFo-DFc map of SAH (blue) contoured at 1.2  $\sigma$ .

**Supplementary Table 1: Data collection and refinement statistics**

|                                                   | MTase-SAH complex<br>(PDB:5WXB)     |
|---------------------------------------------------|-------------------------------------|
| <b>Data Collection</b>                            |                                     |
| X-ray Source                                      | SSRF BL18U                          |
| Wavelength (Å)                                    | 0.97776                             |
| Space group                                       | $P2_12_1$                           |
| Unit cell a, b, c (Å) $\alpha, \beta, \gamma$ (°) | 38.0, 76.9, 109.6, 90.0, 90.0, 90.0 |
| Resolution range* (Å)                             | 50.0–1.76 (1.79–1.76)*              |
| Unique reflections                                | 32,293 (1,405)                      |
| Completeness (%)                                  | 98.8 (88.1)                         |
| Redundancy                                        | 4.9 (3.4)                           |
| $I/\sigma(I)$                                     | 15.6 (1.6)                          |
| Rmerge (%)                                        | 10.8 (50.2)                         |
| <b>Refinement</b>                                 |                                     |
| Resolution range (Å)                              | 44.62–1.76 (1.83–1.76)              |
| Reflections used for $R_{\text{free}}$            | 1,607 (132)                         |
| $R_{\text{work}}$ (%)                             | 17.2 (21.7)                         |
| $R_{\text{free}}$ (%)                             | 19.9 (24.0)                         |
| Number of atoms                                   | 2,407                               |
| Protein                                           | 2,048                               |
| Ligand                                            | 26                                  |
| Water                                             | 333                                 |
| Average B-factors (Å <sup>2</sup> )               | 27.6                                |
| Protein                                           | 26.3                                |
| Ligand                                            | 18.5                                |
| Water                                             | 35.5                                |
| r.m.s. deviations                                 |                                     |
| Bond lengths (Å)                                  | 0.016                               |
| Bond angles (°)                                   | 0.82                                |
| Ramachandran plot (%)                             |                                     |
| Favored                                           | 98.1                                |
| Allowed                                           | 1.9                                 |
| Disallowed                                        | 0.0                                 |

\*Numbers in the brackets are for the highest resolution shell.
